# Supplementary material for: 1-(2-Methoxyphenyl)-3-phenyl-1,4-dihydro-1,2,4-benzotriazin-4-yl: a tricky “structure-to-magnetism” correlation aided by DFT calculations
Source: Royal Society of Chemistry journal article supplement (doi:10.1039/d0ce00669f), 2020-01-01

# 1-(2-Methoxyphenyl)-3-(phenyl)-1,4-dihydro-1,2,4-benzotriazin-4-yl: A Tricky “Structure-to-Magnetism” Correlation Aided by DFT Calculations

Fadwat Bazzi,<sup>a</sup> Alexander J. Danke,<sup>a</sup> Daniel B. Lawson,<sup>a</sup> Maria Manoli,<sup>c</sup> Gregory M. Leitus,<sup>b</sup> Panayiotis A. Koutentis<sup>c</sup> and Christos P. Constantinides,<sup>\*,a</sup>

<sup>a</sup> Department of Natural Sciences, University of Michigan – Dearborn, 4914 Evergreen Road, Dearborn, MI 48128-1491, United States. E-mail: [cconst@umich.edu](mailto:cconst@umich.edu) Fax: +01 3135934937 Tel: +01 3135836728

<sup>b</sup> Chemical Research Support Unit, Weizmann Institute of Science, 7610001 Rehovot, Israel

<sup>c</sup> Department of Chemistry, University of Cyprus, P.O. Box 20537, 1678 Nicosia, Cyprus

## Supporting Information

|                                                                                                                                                                                         |        |
|-----------------------------------------------------------------------------------------------------------------------------------------------------------------------------------------|--------|
| <b>Table T1</b> Comparison of selected experimental and computational intramolecular geometrical parameters for the 1-(2-Methoxyphenyl)-3-(phenyl)-1,4-dihydro-1,2,4-benzotriazin-4-yl. | Page 2 |
| <b>Fig. S1</b> Mean distance between the centroids of 1,2,4-triazinyl and N-(2-anisole) rings in dimer I and dimer II.                                                                  | Page 3 |
| <b>Fig. S2</b> Dihedral angles of alternating radicals forming the herringbone pattern of chain C2.                                                                                     | Page 3 |
| <b>Fig. S3</b> Experimental and simulated EPR for 1-(2-Methoxyphenyl)-3-(phenyl)-1,4-dihydro-1,2,4-benzotriazin-4-yl.                                                                   | Page 4 |
| <b>Fig. S4</b> Powder X-ray diffraction patterns for radical <b>2</b> (top) collected at 300 K (red line) and calculated from the single crystal X-ray structure at 100 K (blue line).  | Page 4 |

**Table T1** Comparison of selected experimental and computational UB3LYP/6-311+G(d,p) intramolecular geometrical parameters for the 1-(2-Methoxyphenyl)-3-(phenyl)-1,4-dihydro-1,2,4-benzotriazin-4-yl.

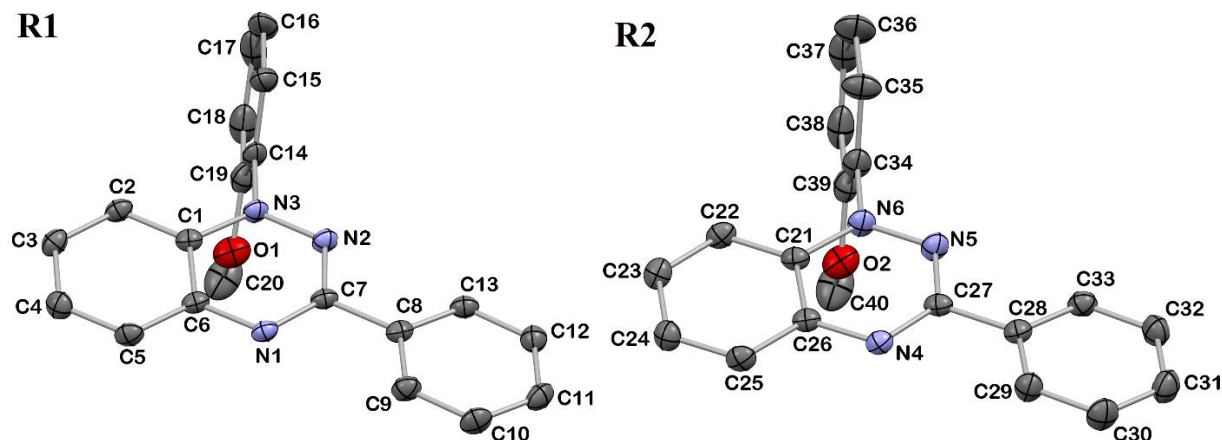

| XRD (R1)                   | XRD (R2)                 | DFT                |
|----------------------------|--------------------------|--------------------|
| <b>Bond Lengths (Å)</b>    |                          |                    |
| N3-N2 = 1.374(2)           | N6-N5 = 1.368(2)         | N-N = 1.360(3)     |
| N2-C7 = 1.335(3)           | N5-C27 = 1.334(3)        | N-C = 1.337(0)     |
| C7-N1 = 1.333(3)           | C27-N4 = 1.334(3)        | C-N = 1.335(0)     |
| N1-C6 = 1.379(2)           | N4-C26 = 1.378(2)        | N-C = 1.368(5)     |
| C6-C1 = 1.412(3)           | C26-C21 = 1.404(3)       | C-C = 1.421(4)     |
| C1-N3 = 1.380(3)           | C21-N6 = 1.385(3)        | C-N = 1.390(0)     |
| <b>Bond Angles (°)</b>     |                          |                    |
| N3-N2-C7 = 115.0(2)        | N6-N5-C27 = 115.1(2)     | N-N-C = 116.4(6)   |
| N2-C7-N1 = 127.5(2)        | N5-C27-N4 = 127.5(2)     | N-C-N = 126.7(2)   |
| C7-N1-C6 = 116.4(2)        | C27-N4-C26 = 116.3(2)    | C-N-C = 116.5(6)   |
| N1-C6-C1 = 121.2(2)        | N4-C26-C21 = 121.4(2)    | N-C-C = 121.4(7)   |
| C6-C1-N3 = 116.1(2)        | C26-C21-N6 = 116.1(2)    | C-C-N = 115.9(3)   |
| C1-N3-N2 = 123.7(2)        | C21-N6-N5 = 123.5(2)     | C-N-N = 122.6(8)   |
| <b>Dihedral Angles (°)</b> |                          |                    |
| C1-N3-C14-C19 = 79.6(3)    | C21-N6-C34-C35 = 79.1(3) | C-N-C-C = 71.9(2)  |
| C19-C14-N3-N2 = 89.5(2)    | C39-C34-N6-N5 = 86.4(3)  | C-C-N-N = 110.5(3) |
| N1-C7-C8-C9 = 6.1(3)       | N4-C27-C28-C29 = 7.6(3)  | N-C-C-C = 2.3(6)   |
| N2-C7-C8-C13 = 5.4(3)      | N5-C27-C28-C33 = 7.7(3)  | N-C-C-C = 2.1(7)   |

**Fig. S1** Mean distance between the centroids of 1,2,4-triazinyl and N-(2-anisole) rings in dimer I (left) and dimer II (right).

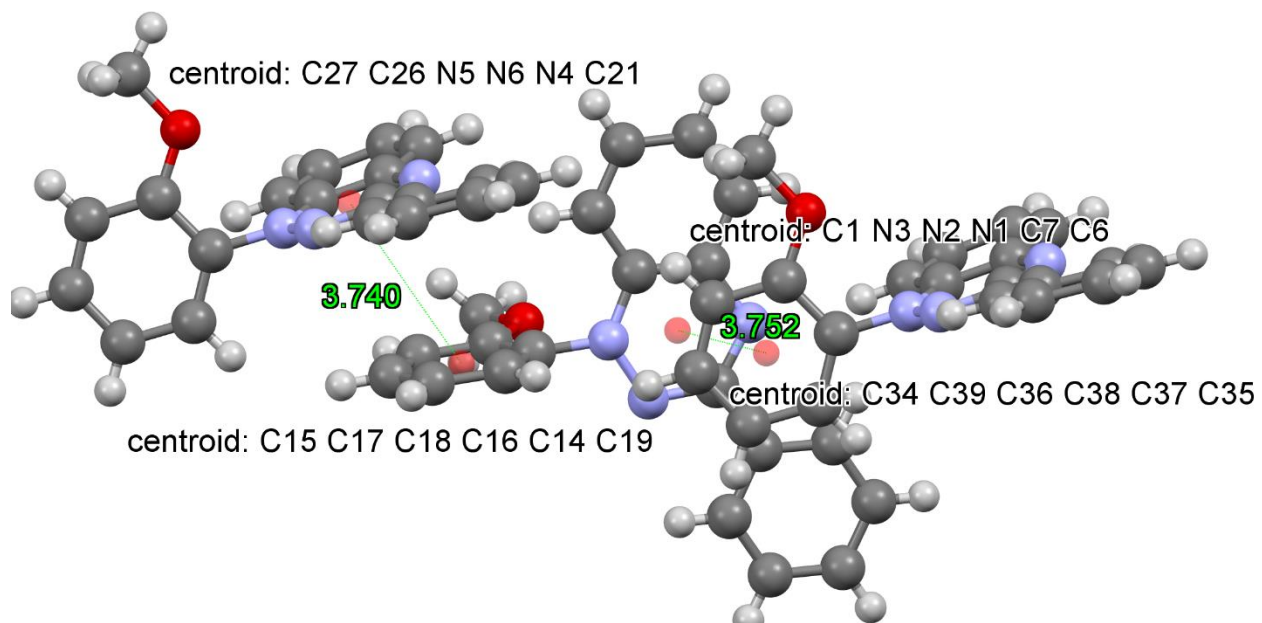

**Fig. S2** Dihedral angles of alternating radicals forming the herringbone pattern of chain C2.

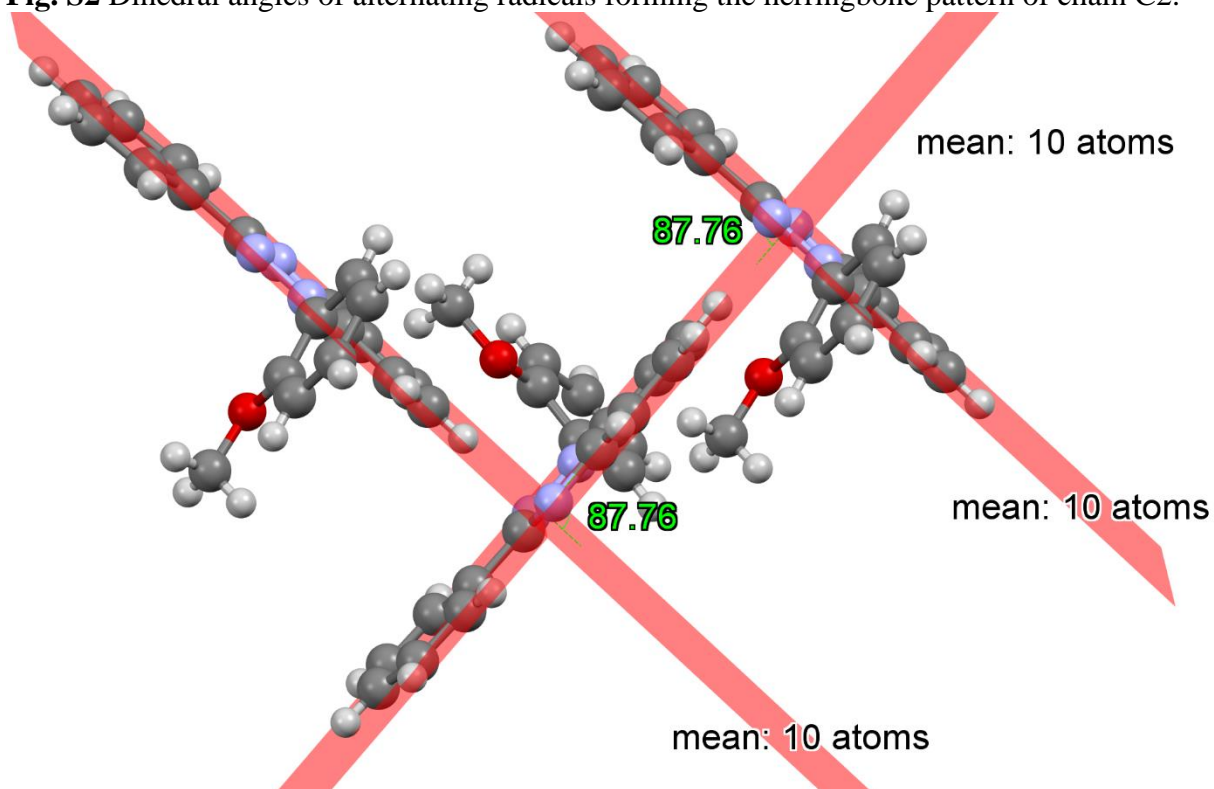

**Fig. S3** Experimental ( $\text{CH}_2\text{Cl}_2$ ,  $25^\circ\text{C}$ ) and simulated EPR for 1-(2-Methoxyphenyl)-3-(phenyl)-1,4-dihydro-1,2,4-benzotriazin-4-yl.

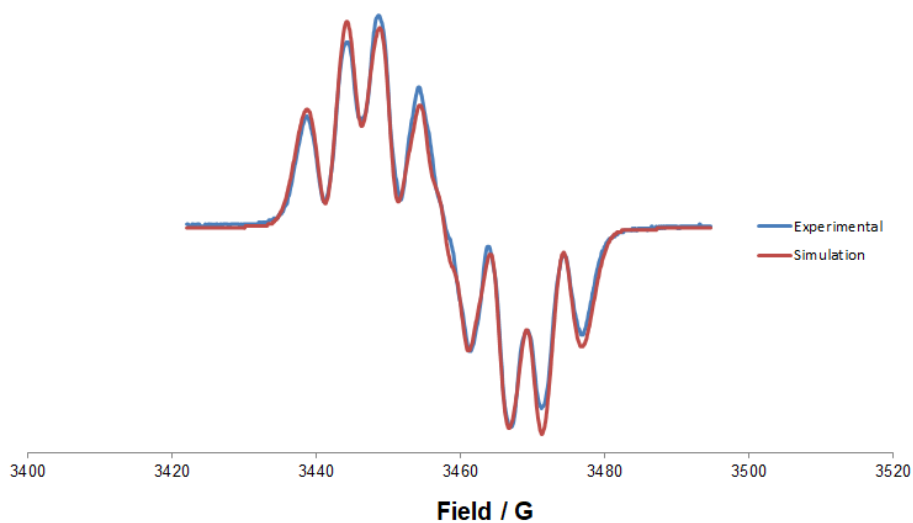

Fitting parameters:  $g = 2.003685$ ,  $a_{\text{N}(1)} = 7.55$  G,  $a_{\text{N}(2)} = 4.70$  G,  $a_{\text{N}(4)} = 5.04$  G (Lineshape:  $\Delta H_{\text{pp}} = 2.01$  G, 15% Lorentzian, 85% Gaussian).

**Fig. S4** Powder X-ray diffraction patterns for radical **2** (top) collected at 300 K (red line) and calculated from the single crystal X-ray structure at 100 K (blue line).

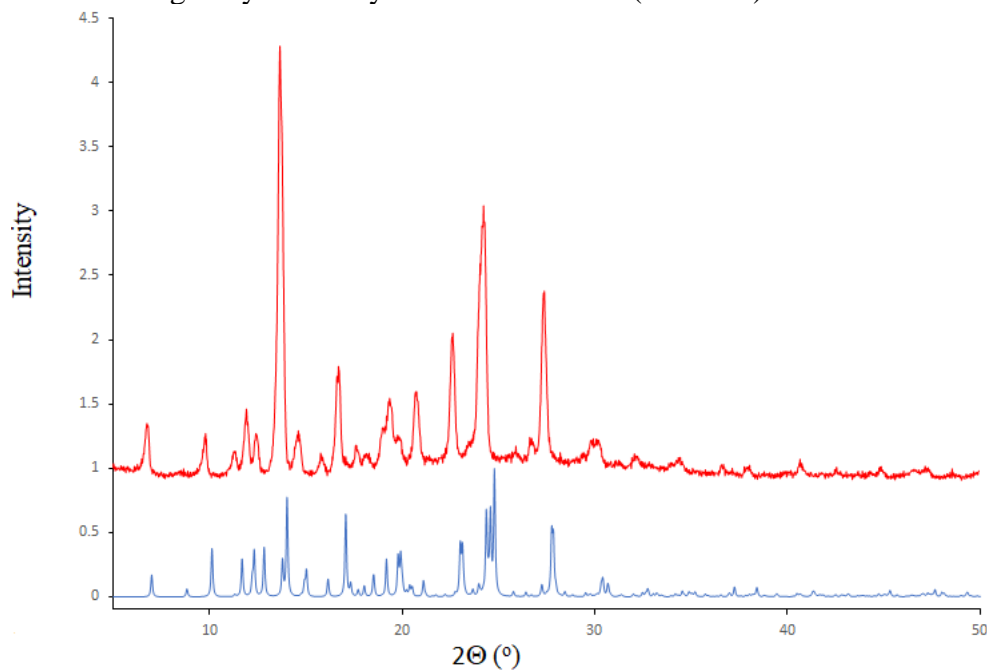

Supplement: d0ce00669f1.pdf [file d0ce00669f1.pdf]
